# Supplementary material
Source: PubMed Central journal article supplement (PMC4863582)
Supplement: sph002162019st1.pdf [file sph002162019st1.pdf]

| <b>Virus Name</b> | <b>TMER</b> | <b>Mutation</b> | <b>Virus Backbone</b> |
|-------------------|-------------|-----------------|-----------------------|
| MHV68.ΔmiR2.3     | 2           | ΔSL1 ΔSL2       | MHV68.ORF73β1a BAC    |
| MHV68.ΔmiR2       | 2           | ΔSL1            | MHV68.ORF73β1a BAC    |
| MHV68.ΔmiR5.6     | 4           | ΔSL1 ΔSL2       | MHV68.ORF73β1a BAC    |
| MHV68.ΔmiR5       | 4           | ΔSL1            | MHV68.ORF73β1a BAC    |
| MHV68.ΔmiR6       | 4           | ΔSL2            | MHV68.ORF73β1a BAC    |
| MHV68.ΔmiR5.6REV  | 4           | +SL1+SL2        | MHV68.ΔmiR5.6 BAC     |
| MHV68.ΔmiR6.5sm   | 4           | ΔSL2.miR*       | MHV68.ΔmiR6 BAC       |
| MHV68.ΔmiR5.6sm   | 4           | ΔSL1.miR*       | MHV68.ΔmiR5 BAC       |
| MHV68.ΔmiR5.6dsm  | 4           | ΔSL1.miR**      | MHV68.ΔmiR5.6sm BAC   |
| MHV68.ΔmiR7.12    | 5           | ΔSL1 ΔSL2       | MHV68.ORF73β1a BAC    |
| MHV68.ΔmiR15.9    | 8           | ΔSL1 ΔSL2       | MHV68.ORF73β1a BAC    |
| MHV68.ΔmiR9       | 8           | ΔSL2            | MHV68.ORF73β1a BAC    |

Table S1. MHV68 TMER-recombinant viruses generated by two-step red-mediated lambda recombination.
