# Supplementary material
Source: PubMed Central journal article supplement (PMC4863582)
Supplement: sph002162019st2.pdf [file sph002162019st2.pdf]

| <b>Virus</b>   | <b>TMER mutated</b> | <b>Frequency of genome+ cells</b> |
|----------------|---------------------|-----------------------------------|
| MHV68          | None                | 1 in 250                          |
| MHV68.Zt6      | 1-8                 | 1 in 690                          |
| MHV68.ΔmiR2    | 2                   | 1 in 320                          |
| MHV68.ΔmiR2.3  |                     | 1 in 575                          |
| MHV68.ΔmiR5.6  | 4                   | 1 in 6500                         |
| MHV68.Δ7.11    | 5                   | 1 in 500                          |
| MHV68.ΔmiR15.9 | 8                   | 1 in 250                          |
| MHV68.ΔmiR9    |                     | 1 in 430                          |

**Table S2.** Frequencies of genome+ splenocytes for individual TMER mutant viruses. Frequencies correspond to data presented in Fig. 1A.
